---

# Author Index

---

- Abbas, Sascha - 208-S, 384-S  
Abrahamowicz, Michal - 553  
Adams, Melissa M - 115  
Agarwal, Sunil K - 265-S  
Aiello, Allison E - 017  
AL-Farsi, Yahya M - 109-S  
Alamgir, Hasanat - 483-S  
Albrecht, Sandra - 078-S  
Alonso, A - L15  
Alonso, Alvaro - 203  
Althoff, Keri - 493-S  
Amirian, E - 255-S  
Anderson, Kelly K - 429-S  
Ando, Daisuke - 310  
Andrade, Flavia - 151, 308  
Arah, Onyebuchi A - 341, 525  
Argos, Maria - 567-S  
Auchincloss, Amy H - 193, 311  
Babey, Susan H - 173  
Baer, Heather J - 130  
Bah, Ebrima - 444-S  
Bandera, Elisa V - 562  
Bansil, Pooja - 365  
Bao, Ying - 154-S  
Barquera, S - 549  
Basso, Olga - 061  
Batty, David G - 558  
Baumgartner, Richard - L14  
Beaber, Elisabeth F - 248-S  
Berkman, Lisa F - 373  
Bertrand, Kimberly - 569-S  
Beveridge, Rachelle - 470-S  
Bhatti, Parveen - 383  
Boccia, Stefania - 202  
Boggs, Deborah A - 398-S  
Boyd, Heather A - 196  
Boykin, Shawn - 499  
Branum, Amy - 072, 073  
Brasky, Ted M - 564-S  
Braunstein, Sarah - 327-S  
Brender, Jean - 405  
Brenner, Darren - 205-S  
Brindel, Pauline - 234-S  
Brinton, Louise - 357  
Brouwers, Marijn M - 215-S, 216-S  
Brown, Monica - 164  
Browne, Richard W - 369  
Burstyn, Igor - 443  
Byers, Lisa G - 521  
Byrne, J - L11  
Cadmus, Lisa - 023  
Cagney, KA - 548  
Cain, Lauren E - 326-S  
Canfield, Mark A - 024, 219  
Canos, Daniel - 279-S  
Cao, Yang - 060-S  
Cardenas, Victor M - 052, 286, 287-S  
Carroll, Tamyra - 533  
Cato V, Janet M - 089  
Catov, Janet M - 352  
Celebi, Selman - 328  
Cerdeza, Magdalena - 348, 397, 524  
Chang, Chin-Kuo - 292  
Chang, Shelley - 157-S  
Chauvin, Pierre - 144  
Chavarro, JE - L4  
Chen, Aimin - 076, 400  
Chen, Huei-Yang - 485-S  
Chen, Ruoling - 148  
Chen, Xiaoli - 254-S  
Chen, Y - L5  
Chen, Yu - 403  
Chien, Kuo-Liong - 307, 355  
Chiu, Yueh-Hsiu - 473-S  
Cho, Hong-Jun - 264  
Choudhary, Ekta - 482-S  
Clark, Cari J - 392  
Clarke, Philippa - 502  
Cogswell, Mary - 441  
Cole, Stephen R - 552  
Conroy, Shannon M - 358-S  
Coogan, Patricia F - 120, 409  
Cook, Nancy - 432  
Cook, Thomas D - 182  
Correa, Adolfo - 221  
Cozier, Yvette C - 520  
Csizmadia, Ilona - 050  
Cupul-Uicab, Lea A - 058  
D'Aloisio, AA - L3  
Dailey, Amy - 136  
Danforth, Kim - 563-S  
Danielson, Kirstie K - 314  
Datta, Geetanjali D - 364  
Davis, Shane - 027  
DeFries, Erin L - 489  
DeFries, Triveni - 391-S  
deHeer, Hendrik - 284-S  
Delaney, Joseph AC - 189, 474  
Deng, Yingzi - 285  
DeRoo, Lisa A - 123  
Dolecek, Therese A - 039  
Doria-Rose, Vincent P - 430-S, 431-S  
Dowd, Jennifer B - 190, 380  
Dragomir, Anca B - 127, 128  
Drake, Bettina - 515  
Duncan, Greg - 375  
Dunn, Julie E - 014  
Durazo-Arvizu, Ramon A - 271  
Ebi, Kristie L - 539, 540  
Ehrenstein, Vera - 088  
Ehrental, Deborah - 093  
El-Sayed, Abdulrahman M - 074-S  
El-Zein, Mariam - 453-S  
Eldeirawi, Kamal - 053, 054-S  
Emeka, Ohia - 324-S  
Enewold, Lindsey - 246  
Englert, Heike - 260  
Ertel, Karen A - 401-S  
Estrada, Carmela L - 318  
Evans, Eva L - 320-S  
Evans, Natalie S - 274-S  
Everage, Nicholas - 316-S, 317-S  
Everson-Rose, Sue - 381, 527  
Fang, Raymond - 117, 330  
Faul, Jessica - 152  
Fernandez, E - L2  
Ferris, Jennifer - 029  
Ferrucci, Leah - 051-S  
Fischer, Mary - 005  
Fitchett, George - 259  
Fitzgerald, Edward - 414  
Fleischer, Nancy L - 356-S  
Flom, Julie - 030-S  
Foraker, Randi E - 390-S  
Forster, Jean - 020  
Foy, Capri - 388  
Franco, Manuel - 174, 263  
Fraser, Gary E - 048, 344, 416  
Fromewick, Jill - 494-S  
Funke, Silvia - 200-S  
Furumoto-Dawson, Alice - 526  
Galea, Sandro - 168  
Gallagher, Alexa - 069-S  
Gallagher, Carolyn M - 124-S  
Gallicchio, Lisa - 075  
Gao, Xiang - 463  
Gehlert, Sarah - 165  
Gerberich, Susan G - 472  
Getahun, Darios - 107-S, 198-S  
Gierach, Gretchen - 031-S  
Gilboa, Suzanne M - 213, 214  
Gladney, Neil - 338-S  
Glass, Thomas A - 171  
Glymour, M Maria - 188, 372  
Goldmann, Emily - 346-S  
Gollenberg, Audra - 098-S  
Gomez de la Camara, Agustin - 266  
Grewal, Jagteshwar - 101  
Griffin, Russell - 490-S  
Guibout, C - 232-S  
Gurka, Kelly - 481  
Hagen, Erika W - 065-S

- Haggerty, Catherine L - 094, 095  
Hall, Chris J - 025  
Hall, Ingrid J - 500  
Han, Ling - 008  
Harel, Ofer - 371  
Harper, Sam - 146  
Harville, E - L16  
Harville, Emily W - 082, 427, 428  
Haskins, Amy - 141-S  
He, Wei - 129-S  
Heavner, Karyn - 342, 459  
Hein, Misty J - 445  
Hernandez, Rohini K - 475-S  
Hernández-Díaz, Sonia - 385, 478  
Hiatt, Robert A - 162  
Hill, Sarah E - 510-S  
Hoppin, Jane A - 464  
Hubbard, Alan E - 178  
Hughes, Jeffery P - 077  
Hunte, Haslyn - 535  
Huo, Dezheng - 462  
Hutfless, Susan - 476-S  
Huynh, Mary - 418  
Imamura, F - L9  
Ionescu-Ittu, Raluca - 551-S  
Isasi, Carmen R - 062  
Ishak, Miriam B - 411-S  
Iuliano, Danielle A - 291-S  
Jaceldo-Siegl, Karen - 046  
Jackson, Rachael - 522-S  
Jacobsen, Steven J - 063  
James, Bryan - D 150-S  
Janevic, Teresa - 496-S  
Jeon, Christie Y - 297-S  
Jeong, Jin-Young - 211  
Jung, Yulwon - 304  
Jiamjarasrangsri, Wiroj - 466, 467  
Joffe, Marshall - 186, 455  
Johnson, Kimberly J - 236-S  
Johnson, Michelle A - 511  
Johnson, Pamela Jo - 529  
Jones, Elizabeth - 210-S  
Jorgensen, Lindsay - 534-S  
Joseph, Parveen Nedra - 258-S  
Joslin, Charlotte E - 302-S  
Jukic, Anne Marie - 091-S  
Jung-Choi, Kyunghiee - 512  
Jurek, Anne - 434  
Justin, Lessler - 300-S  
Kabat, Geoffrey C - 223, 420  
Kalaydjian, Amanda - 394  
Kalra, Tara - 021-S  
Karavolos, Kelly - 514  
Kaufman, Jay S - 169, 546  
Keay, Lisa - 491  
Keim, Sarah A - 402-S  
Kelley, T - L1  
Keyes, Katherine M - 436-S  
Kharrazi, Martin - 139  
Kim, Myoung-Hee - 347, 531  
Kinney, Patrick L - 542  
Klebanoff, Mark - 435  
Klein, Barbara EK - 244  
Klein, Ronald - 012  
Knudtson, Michael D - 004  
Kogan, Michael D - 335  
Kondo, Naoki - 195  
Kramer, Michael - 557-S  
Krantz, Elizabeth M - 006  
Kreisel, Kristen - 296-S  
Krishnadasan, Anusha - 289  
Krishnan, Supriya - 313  
Kubo, Ai - 224  
Kucik, James - 086  
Lacher, David - 206  
Lambe, Mats - 249, 359  
Laughlin, Shannon - 132-S  
Lawrence, Jean M - 106  
Lawson, Christina C - 108  
Leadbetter, Steven - 454  
Lee, Brian K - 194-S  
Lee, Chien-Hung - 241  
Leffondre, Karen - 437  
Lemelin, Emily - 559-S  
Lessler, Justin - 301-S  
Levine, Robert S - 350  
Levitan, Emily B - 269  
LeWinn, Kaja Z - 555  
Li, D-K - L6  
Lin, Shao - 161, 407  
Lippman, Sheri A - 325-S  
Lipton, Rebecca B - 315  
Lis, Christopher G - 155  
Little, Rod - 370  
Liu, Aihua - 451-S  
Liu, Jia-Sin - 337-S  
Liu, Jihong - 131  
Liu, Juxin - 442  
Liu, Sze Y - 011-S  
Lochner, Kim A - 176  
Lohsoonthorn, Vitool - 207-S  
Loucks, Eric B - 519, 556  
Love, Catherine - 099  
Low, NC - L7  
Luo, Zhon-Cheng - 112, 113  
Lutsey, Pamela L - 268-S  
Lyon, Joseph L - 064  
Ma, Yunsheng - 041  
MacDougall, Conan - 477  
MacInnis, Jennifer - 071-S  
MacLehose, Richard - 458  
Maguire, Ann - 331  
Magzamen, Sheryl - 177, 180  
Malaka, David O - 032  
Maldonado, George - 456  
Mallin, Katherine - 245  
Mancha, Emma B - 160-S  
Mao, I-Fang - 404  
Marano, Cinzia - 415  
Marino, Jennifer L - 035-S  
Marrett, Loraine - 251  
Martin, Emily - 066-S  
Martiniuk, Alexandra LC - 333, 423, 424  
Massad, S - L8  
Massad, Salwa - 038-S  
Maxson, Pamela - 386  
McCanlies, Erin C - 262  
McHugh, Michelle K - 067-S  
McQuillan, Geraldine - 362  
Mehta, Shruti - 170  
Meinhold, Cari L - 156-S  
Mekary, Rania - 119  
Mendes de Leon, Carlos F - 377, 378  
Menke, Andy - 267-S  
Mera, Robertino - 295  
Merchant, Shelita G - 503-S  
Messer, Lynne C - 191  
Metghalchi, Shiva - 419-S  
Meyer, Tamra E - 321-S  
Min, JungWon - 068-S, 509-S  
Miranda, Marie Lynn - 565  
Mohllajee, Anshu - 393-S  
Moller, Stephanie - 406  
Moniruzzaman, Akm - 305-S  
Moore, LV - 568  
Moorman, Patricia G - 126  
Morozova, N - L13  
Morrato, Elaine H - 159  
Morrison, David S - 504  
Mostofsky, Elizabeth - 270-S  
Mujahid, Mahasin S - 495  
Mulla, Zuber D - 084  
Murphy, Gwen - 243-S  
Nandi, Arijit - 147-S, 530-S  
Nechuta, Sarah - 034-S  
Nelson, Matthew - 492-S  
Nembhard, Wendy N - 217  
Ng, Carmen - 233  
Nguyen, Ruby - 125  
Nguyen, Cat Tuong - 422-S  
Nicolau, Belinda - 282  
Nimptsch, Katharina - 042-S  
Ning, Yi - 238  
Nondahl, David M - 312  
Nsagha, Dickson S - 222-S  
O'Neill, Marie - 541  
Oakes, J Michael - 545  
Oglesby, Willie H - 018-S  
Ojha, Rohit P - 253-S  
Olopade, Funmi - 163  
Osypuk, Theresa L - 181, 185, 192  
Palloni, A - 550  
Palmer, Julie R - 235  
Paquet, Catherine - 513

## Author Index

---

- Parent, Marie-Elise - 247  
Parikh-Patel, Arti - 237  
Park, Kyong - 037-S  
Park, Song-Yi - 240  
Parker, Emily - 517  
Patel, Mehul D - 506-S  
Paynter, Nina P - 272  
Pearson, Jay - 138  
Peck, Jennifer D - 412  
Peek, Monica E - 026  
Perez, Vanessa - 303-S  
Perez-Saldivar, Maria Luisa - 229-S  
Perkins, Neil J - 447-S  
Phillips, Carl V - 376, 460  
Phipps, Amanda I - 361-S  
Picciotto, Sally - 554  
Pinchoff, Jessie - 019  
Pirtle, Crystal - 033-S  
Porucznik, Christina A - 340, 479, 480  
Preis, Sarah Rosner - 345  
Prescott, Marta R - 523-S  
Prizment, Anna E - 561-S  
Protas, Bridget M - 204-S  
Pulungan, Zulkarnain - 507  
Purdue, Mark P - 560  
Puumala, Susan E - 228-S  
Quillian, Lincoln - 184  
Rachet, Bernard - 448  
Ranjit, Nalini - 379  
Rasmussen-Torvik, Laura - 056  
Reardon, Sean F - 183  
Rehkopf, David H - 543, 544  
Rey, Grégoire - 408  
Rhew, Isaac - 426-S  
Robbins, Cheryl L - 353  
Robledo, Candace - 417-S  
Romieu, Isabelle - 092, 566  
Romitti, Paul A - 449  
Root, Michael - 433  
Rose, Kathryn M - 278  
Rosenberg, Deborah - 461  
Rosenberg, Lynn - 360  
Rosenblatt, Karin A - 036  
Rosenblum, Michael - 374  
Rosenthal, Leslie A - 446-S  
Ross, Sonja V - 149  
Roy, Jason - 438  
Rubin, Marcie - 135-S  
Ryskulova, Asel - 334  
Sadetsky, Natalia - 225-S  
Sage, Starr K - 486-S  
Sanchez, Brisa N - 439  
Santiago, Vivian - 396-S  
Santos, Itamar S - 002-S  
Sato, Miri - 059-S  
Saydah, Sharon - 172  
Schenk, Thomas - 158  
Schisterman, Enrique F - 368  
Schmitz, Norbert - 425  
Schubert, Carla R - 275  
Schumann, Barbara - 501  
Schweizer, Marin - 298-S  
Scott, Jim - 179  
Scribner, Richard A - 137, 505  
Sergeev, Alexander - 413  
Shack, Lorraine - 242-S  
Shah, Neil - 016-S  
Shareck, Martine - 239-S  
Sharma, S Shelley - 047  
Shi, Zumin - 319  
Shiels, Meredith - 450-S  
Shin, Mikyong - 220  
Shin, Myung-Hee - 045  
Shoham, David A - 547  
Short, Vanessa - 121-S  
Simanek, Amanda - 389-S  
Simonet, Fabienne - 110-S  
Singh, Gopal K - 022  
Skeete, Rachel - 532-S  
Smiley, Melissa - 387-S  
Song, Y - L12  
Sotres-Alvarez, Daniela - 049-S  
Spector, Logan G - 351  
Sponsiello-Wang, Zheng - 226  
Stang, Andreas - 256, 257, 440  
Staras, Stephanie - 290  
Steege, Andrea L - 469-S  
Stegne, Marina - 309  
Stein, Cheryl - 140  
Stockman, Jamila - 133-S  
Stolzenberg-Solomon, Rachael Z - 153  
Stürmer, Til - 010, 343  
Suarez, Lucina - 218  
Sullivan, Patricia A - 468  
Suzuki, Kohta - 057  
Svastisalee, Chalida - 040-S  
Swamy, Geeta K - 087  
Ta, Myduc - 471-S  
Tackett, Julie A - 085-S, 322-S  
Tamim, Hala - 299  
Tan, Hsiu-Fen - 336  
Taubman, Sarah - 145, 187  
Taylor, Kira - 090-S  
Tehraniifar, Parisa - 518  
Teji, Jagjit - 197  
Terplan, Mishka - 536  
Thomas, Matthew C - 261-S  
Thomas, Yonette - 167  
Thompson, Angela - 273  
Thorpe, Donna - 007  
Thorpe, Lorna E - 175  
Tilmon, Sandra - 366-S  
Torrone, Elizabeth - 363-S  
Tovar, Alison - 116  
Trabert, Britton L - 083-S  
Tracy, Melissa - 395-S, 421-S  
Trevisan, Maurizio - 277  
Tseng, Hung Fu - 288  
Turzanski Fortner, Renee - 102-S, 103-S  
van Rooij, Iris - 212  
Vercambre, Marie-Noël - 003-S  
Vines, Anissa I - 134  
Vinikoor, Lisa C - 252-S  
von Ehrenstein, Ondine S - 199  
Walsh, Matthew C - 230-S  
Walsh, Michael - 488  
Waltenburg, Rachel - 323-S  
Walters, Christine - 354-S  
Wang, Ying-Chih - 001  
Ward, Andrew - 339  
Waring, Molly E - 399-S  
Wassimi, Spogmai - 111-S  
Weed, Douglas L - 457  
Wei, Esther K - 250  
Weiss, Noel - 166, 367  
West, Nancy A - 100-S  
Whitehead, Nedra S - 452  
Widome, Rachel - 516  
Wilcox, Allen - 538  
Williams, Edith M - 118  
Williams Jr, Quintin - 487-S  
Wilson, Kathryn - 043-S, 044-S  
Windham, Gayle C - 070  
Winter, Katherine H - 015-S  
Wise, Lauren A - 079  
Wohlfahrt, Jan - 293, 294  
Wong, Eric - 209-S  
Wu, Han - 332  
Xiong, Xu - 080, 081, 143  
Xu, Hairong - 096-S, 097-S  
Yang, Limin M - 231  
Yang, Seungmi - 528  
Ye, Xibiao - 055, 142  
Yerges, Laura M - 009-S  
Yesupriya, Ajay - 201  
Ylitalo, Kelly R - 028-S  
Yoon, Joanna - 537  
Yost, Kathleen J - 465  
Young-Ho, Khang - 497, 498  
Younus, Muhammad - 306-S  
Zabkiewicz, Denise - 349  
Zagarins, Sofija - 122-S, 410-S  
Zamansani, Tahereh - 280-S  
Zelenskiy, Svetlana - 227-S  
Zhan, Wei-Hai - 013-S  
Zhang, Cuilin - 114, 283  
Zhang, Heping - 382  
Zhang, Qiaoyi - 104-S, 105-S  
Zheng, Wei - L10  
Zhong, Wenjun - 276-S  
Zullo, Melissa D - 281-S





# SOCIETY FOR EPIDEMIOLOGIC RESEARCH

## The 2008 ABRAHAM LILIENFELD ★ STUDENT PRIZE ★

SER is pleased to announce that

**Katherine M. Keyes**

Mailman School of Public Health, Columbia University, and New York State  
Psychiatric Institute.

is the recipient of the 2008 Abraham Lilienfeld Student Prize. The prize was established by SER to honor Dr. Abraham Lilienfeld, a beloved teacher and influential scholar.

The Lilienfeld Prize recognizes “excellence in student research,” and reflects SER’s ongoing commitment to the support and encouragement of students. Katherine M. Keyes will present her paper entitled “*A Comprehensive Approach to Age-Period-Cohort Analysis*” at a plenary session of SER’s 41st Annual Meeting in Chicago, Illinois. The prize includes travel, meeting expenses and an award of \$1,000.

### Past Awardees

|                             |                              |
|-----------------------------|------------------------------|
| 1979 Seymour Gufferman      | 1995 Loran Salamone          |
| 1980 Roger Bernier          | 1996 Lisa Chasen-Taber       |
| 1981 Walter Willett         | 1997 Beverly Rockhill        |
| 1983 Colin Soskolne         | 1998 June Chan               |
| 1984 Lois LeMarchand        | 1999 Sascha Dublin           |
| 1985 Sally Zierler          | 2000 Sonia Hernandez-Diaz    |
| 1986 Christine Cole Johnson | 2001 Dora Il’yasova          |
| 1987 Germaine Buck          | 2002 Lisa Bodnar             |
| 1988 Irva Hertz-Picciotto   | 2003 Tobias Kurth            |
| 1989 John Acquavella        | 2004 Melissa Nelson          |
| 1990 Andrew Roland          | 2005 Suzanne Gilboa          |
| 1991 Rebecca Lipton         | 2006 (Tie) Hugo-Lopez-Gatell |
| 1992 Jonine Bernstein       | Alexis Jeannine Handal       |
| 1993 Louise Kuhn            | 2007 Matthew Fox             |
| 1994 Glinda Cooper          |                              |
